# Supplementary material for: A mosaic adeno-associated virus vector as a versatile tool that exhibits high levels of transgene expression and neuron specificity in primate brain
Source: PubMed Central journal article supplement (PMC10409865; doi:10.1038/s41467-023-40436-1), 2023-08-08
Supplement: 41467_2023_40436_MOESM3_ESM.pdf [file 41467_2023_40436_MOESM3_ESM.pdf]

## **Description of Additional Supplementary Files**

**File name:** Supplementary Data 1

**Description:** Regents and antibodies used in this study.
