# Supplementary material for: A mosaic adeno-associated virus vector as a versatile tool that exhibits high levels of transgene expression and neuron specificity in primate brain
Source: PubMed Central journal article supplement (PMC10409865; doi:10.1038/s41467-023-40436-1), 2023-08-08
Supplement: 41467_2023_40436_MOESM5_ESM.pdf [file 41467_2023_40436_MOESM5_ESM.pdf]

## Reporting Summary

Nature Portfolio wishes to improve the reproducibility of the work that we publish. This form provides structure for consistency and transparency in reporting. For further information on Nature Portfolio policies, see our [Editorial Policies](#) and the [Editorial Policy Checklist](#).

### Statistics

For all statistical analyses, confirm that the following items are present in the figure legend, table legend, main text, or Methods section.

n/a Confirmed

- The exact sample size ( $n$ ) for each experimental group/condition, given as a discrete number and unit of measurement
- A statement on whether measurements were taken from distinct samples or whether the same sample was measured repeatedly
- The statistical test(s) used AND whether they are one- or two-sided  
*Only common tests should be described solely by name; describe more complex techniques in the Methods section.*
- A description of all covariates tested
- A description of any assumptions or corrections, such as tests of normality and adjustment for multiple comparisons
- A full description of the statistical parameters including central tendency (e.g. means) or other basic estimates (e.g. regression coefficient) AND variation (e.g. standard deviation) or associated estimates of uncertainty (e.g. confidence intervals)
- For null hypothesis testing, the test statistic (e.g.  $F$ ,  $t$ ,  $r$ ) with confidence intervals, effect sizes, degrees of freedom and  $P$  value noted  
*Give  $P$  values as exact values whenever suitable.*
- For Bayesian analysis, information on the choice of priors and Markov chain Monte Carlo settings
- For hierarchical and complex designs, identification of the appropriate level for tests and full reporting of outcomes
- Estimates of effect sizes (e.g. Cohen's  $d$ , Pearson's  $r$ ), indicating how they were calculated

*Our web collection on [statistics for biologists](#) contains articles on many of the points above.*

### Software and code

Policy information about [availability of computer code](#)

Data collection

Data analysis

For manuscripts utilizing custom algorithms or software that are central to the research but not yet described in published literature, software must be made available to editors and reviewers. We strongly encourage code deposition in a community repository (e.g. GitHub). See the Nature Portfolio [guidelines for submitting code & software](#) for further information.

### Data

Policy information about [availability of data](#)

All manuscripts must include a [data availability statement](#). This statement should provide the following information, where applicable:

- Accession codes, unique identifiers, or web links for publicly available datasets
- A description of any restrictions on data availability
- For clinical datasets or third party data, please ensure that the statement adheres to our [policy](#)

## Human research participants

Policy information about [studies involving human research participants and Sex and Gender in Research](#).

|                             |     |
|-----------------------------|-----|
| Reporting on sex and gender | N/A |
| Population characteristics  | N/A |
| Recruitment                 | N/A |
| Ethics oversight            | N/A |

Note that full information on the approval of the study protocol must also be provided in the manuscript.

## Field-specific reporting

Please select the one below that is the best fit for your research. If you are not sure, read the appropriate sections before making your selection.

Life sciences       Behavioural & social sciences       Ecological, evolutionary & environmental sciences

For a reference copy of the document with all sections, see [nature.com/documents/nr-reporting-summary-flat.pdf](https://www.nature.com/documents/nr-reporting-summary-flat.pdf)

## Life sciences study design

All studies must disclose on these points even when the disclosure is negative.

|                 |                                                                                                                                                                                                                                                                                                                                                                                                                                                                                                                                                                                |
|-----------------|--------------------------------------------------------------------------------------------------------------------------------------------------------------------------------------------------------------------------------------------------------------------------------------------------------------------------------------------------------------------------------------------------------------------------------------------------------------------------------------------------------------------------------------------------------------------------------|
| Sample size     | In the experiments in monkeys, we determined the sample size for the each series of our experiments as two macaque monkeys. We determined the sample size based on lots of typical primate neuroscience researches. We used eight macaque monkeys because we had four different series of experiments. We do not use any statistical methods to predetermine sample size. In the experiments in rats, the number of animal used was four. To use of statistical analysis (dunnett's t test) among multiple groups, we need to prepare four individuals for one group at least. |
| Data exclusions | No data were excluded from the analyses.                                                                                                                                                                                                                                                                                                                                                                                                                                                                                                                                       |
| Replication     | All attempts at replication were successful. Results were consistent with previous studies and among two or four monkeys for each experiment in the current study.                                                                                                                                                                                                                                                                                                                                                                                                             |
| Randomization   | No experimental groupings were used for this study.                                                                                                                                                                                                                                                                                                                                                                                                                                                                                                                            |
| Blinding        | No applicable because no grouping was performed.                                                                                                                                                                                                                                                                                                                                                                                                                                                                                                                               |

## Behavioural & social sciences study design

All studies must disclose on these points even when the disclosure is negative.

|                   |     |
|-------------------|-----|
| Study description | N/A |
| Research sample   | N/A |
| Sampling strategy | N/A |
| Data collection   | N/A |
| Timing            | N/A |
| Data exclusions   | N/A |
| Non-participation | N/A |
| Randomization     | N/A |

# Ecological, evolutionary & environmental sciences study design

All studies must disclose on these points even when the disclosure is negative.

|                          |     |
|--------------------------|-----|
| Study description        | N/A |
| Research sample          | N/A |
| Sampling strategy        | N/A |
| Data collection          | N/A |
| Timing and spatial scale | N/A |
| Data exclusions          | N/A |
| Reproducibility          | N/A |
| Randomization            | N/A |
| Blinding                 | N/A |

Did the study involve field work?  Yes  No

## Reporting for specific materials, systems and methods

We require information from authors about some types of materials, experimental systems and methods used in many studies. Here, indicate whether each material, system or method listed is relevant to your study. If you are not sure if a list item applies to your research, read the appropriate section before selecting a response.

### Materials & experimental systems

### Methods

- | n/a                                 | Involved in the study                                           |
|-------------------------------------|-----------------------------------------------------------------|
| <input type="checkbox"/>            | <input checked="" type="checkbox"/> Antibodies                  |
| <input type="checkbox"/>            | <input checked="" type="checkbox"/> Eukaryotic cell lines       |
| <input checked="" type="checkbox"/> | <input type="checkbox"/> Palaeontology and archaeology          |
| <input type="checkbox"/>            | <input checked="" type="checkbox"/> Animals and other organisms |
| <input checked="" type="checkbox"/> | <input type="checkbox"/> Clinical data                          |
| <input checked="" type="checkbox"/> | <input type="checkbox"/> Dual use research of concern           |

- | n/a                                 | Involved in the study                           |
|-------------------------------------|-------------------------------------------------|
| <input checked="" type="checkbox"/> | <input type="checkbox"/> ChIP-seq               |
| <input checked="" type="checkbox"/> | <input type="checkbox"/> Flow cytometry         |
| <input checked="" type="checkbox"/> | <input type="checkbox"/> MRI-based neuroimaging |

## Antibodies

Antibodies used

Guinea pig polyclonal anti-NeuN (Millipore, Cat# ABN90); Mouse monoclonal anti-S100 $\beta$  (Sigma-Aldrich, Cat# s2532); Donkey-anti-GP DyLight405 (Jackson ImmunoResearch Laboratories, Inc., Cat# 706-475-148); Donkey-anti-Ms AF647 (Jackson ImmunoResearch Laboratories, Inc., Cat# 706-605-148); Chicken monoclonal anti-GFP (Abcam, Cat# ab13970); Rabbit monoclonal anti-DARPP-32 (Cell Signaling Technology, Cat# 2302); Mouse monoclonal anti-PV (Sigma-Aldrich, Cat# P3088); Goat monoclonal anti-ChAT (Sigma-Aldrich, Cat# AB144P); Rabbit monoclonal anti-GFP (Invitrogen, Cat# G10362); Rabbit polyclonal anti-M3 (Atlas Antibodies, Cat# HPA024106); Donkey-anti-Rb AF555 (Invitrogen, Cat# A31572); Donkey-anti-Ck AF488 (Jackson ImmunoResearch Laboratories, Inc., Cat# 703-545-155); Donkey-anti-Ms AF555 (Invitrogen, Cat# A31570); Rabbit polyclonal anti-c-fos (Abcam, Cat# ab190289); Donkey-anti-Rb Biotin (Jackson ImmunoResearch Laboratories, Inc., Cat# 711-065-152)

Validation

The anti-c-fos primary antibody was applied with primate brain sections by Alexander, L. et al (Neuron, 2019).  
The other commercial antibodies were validated by manufacturer, as follows:  
Guinea pig polyclonal anti-NeuN: [https://www.merckmillipore.com/JP/ja/product/Anti-NeuN-Antibody,MM\\_NF-ABN90](https://www.merckmillipore.com/JP/ja/product/Anti-NeuN-Antibody,MM_NF-ABN90)  
Mouse monoclonal anti-S100 $\beta$ : <https://www.sigmaaldrich.com/JP/en/product/sigma/s2532>  
Donkey-anti-GP DyLight405: <https://www.jacksonimmuno.com/catalog/products/706-475-148>  
Donkey-anti-Ms AF647: <https://www.jacksonimmuno.com/catalog/products/706-605-148>  
Chicken monoclonal anti-GFP: <https://www.abcam.com/products/primary-antibodies/gfp-antibody-ab13970.html>  
Rabbit monoclonal anti-DARPP-32: <https://www.cellsignal.com/products/primary-antibodies/darpp-32-antibody/2302>  
Mouse monoclonal anti-PV: <https://www.sigmaaldrich.com/JP/en/product/sigma/p3088>  
Goat monoclonal anti-ChAT: <https://www.sigmaaldrich.com/JP/en/product/mm/ab144p>  
Rabbit monoclonal anti-GFP: <https://www.thermofisher.com/antibody/product/GFP-Antibody-Recombinant-Monoclonal/G10362>  
Rabbit polyclonal anti-M3: <https://www.atlasantibodies.com/products/antibodies/primary-antibodies/triple-a-polyclonals/chr3->

antibody-hpa024106/

Donkey-anti-Rb AF555: <https://www.thermofisher.com/antibody/product/Donkey-anti-Rabbit-IgG-H-L-Highly-Cross-Adsorbed-Secondary-Antibody-Polyclonal/A-31572>Donkey-anti-Ck AF488: <https://www.jacksonimmuno.com/catalog/products/703-545-155>Donkey-anti-Ms AF555: <https://www.thermofisher.com/antibody/product/Donkey-anti-Mouse-IgG-H-L-Highly-Cross-Adsorbed-Secondary-Antibody-Polyclonal/A-31570>Rabbit polyclonal anti-c-fos: <https://www.abcam.com/products/primary-antibodies/c-fos-antibody-bsa-free-ab190289.html>Donkey-anti-Rb Biotin: <https://www.jacksonimmuno.com/catalog/products/711-065-152>

## Eukaryotic cell lines

Policy information about [cell lines and Sex and Gender in Research](#)

|                                                                      |                                                                                                            |
|----------------------------------------------------------------------|------------------------------------------------------------------------------------------------------------|
| Cell line source(s)                                                  | AAV-293 cells were purchased from Stratagene.                                                              |
| Authentication                                                       | AAV-293 cells were authenticated by the supplier (Stratagene) using morphology and growth characteristics. |
| Mycoplasma contamination                                             | AAV-293 cells have been tested and shown to be free from mycoplasma.                                       |
| Commonly misidentified lines<br>(See <a href="#">ICLAC</a> register) | No commonly misidentified cell lines were used.                                                            |

## Palaeontology and Archaeology

|                                                                                                                                                 |     |
|-------------------------------------------------------------------------------------------------------------------------------------------------|-----|
| Specimen provenance                                                                                                                             | N/A |
| Specimen deposition                                                                                                                             | N/A |
| Dating methods                                                                                                                                  | N/A |
| <input type="checkbox"/> Tick this box to confirm that the raw and calibrated dates are available in the paper or in Supplementary Information. |     |
| Ethics oversight                                                                                                                                | N/A |

Note that full information on the approval of the study protocol must also be provided in the manuscript.

## Animals and other research organisms

Policy information about [studies involving animals; ARRIVE guidelines](#) recommended for reporting animal research, and [Sex and Gender in Research](#)

|                         |                                                                                                                                                                                                                                                                                                                                                                                                                                                                                                                                                                                                                                                                                                                                                                                                                                                                                                                                                                                                                                                                                                                                                                                                                                                                                                                                                                                                                                 |
|-------------------------|---------------------------------------------------------------------------------------------------------------------------------------------------------------------------------------------------------------------------------------------------------------------------------------------------------------------------------------------------------------------------------------------------------------------------------------------------------------------------------------------------------------------------------------------------------------------------------------------------------------------------------------------------------------------------------------------------------------------------------------------------------------------------------------------------------------------------------------------------------------------------------------------------------------------------------------------------------------------------------------------------------------------------------------------------------------------------------------------------------------------------------------------------------------------------------------------------------------------------------------------------------------------------------------------------------------------------------------------------------------------------------------------------------------------------------|
| Laboratory animals      | Rhesus monkey ( <i>Macaca mulatta</i> ), two female, 8 and 18 years old, 5.6-7.8 kg; <i>Cynomolgus</i> monkey ( <i>Macaca fascicularis</i> ), one male, 4 years old, 5.2 kg; Japanese monkeys ( <i>Macaca fuscata</i> ), one male, four females, 3-12 years old, 5.3-8.3 kg, Wistar rat, twenty males, 12-13 weeks old, 260-318g                                                                                                                                                                                                                                                                                                                                                                                                                                                                                                                                                                                                                                                                                                                                                                                                                                                                                                                                                                                                                                                                                                |
| Wild animals            | No wild animals were used in this study.                                                                                                                                                                                                                                                                                                                                                                                                                                                                                                                                                                                                                                                                                                                                                                                                                                                                                                                                                                                                                                                                                                                                                                                                                                                                                                                                                                                        |
| Reporting on sex        | All animals sex were reported above.                                                                                                                                                                                                                                                                                                                                                                                                                                                                                                                                                                                                                                                                                                                                                                                                                                                                                                                                                                                                                                                                                                                                                                                                                                                                                                                                                                                            |
| Field-collected samples | No field-collected samples were used in this study.                                                                                                                                                                                                                                                                                                                                                                                                                                                                                                                                                                                                                                                                                                                                                                                                                                                                                                                                                                                                                                                                                                                                                                                                                                                                                                                                                                             |
| Ethics oversight        | For the first set of our experiments with Monkeys A-D and the rats on gene transduction properties of mosaic AAV vectors, the experimental protocol was approved by the Animal Welfare and Animal Care Committee of the Primate Research Institute, Kyoto University (Permission Number: 2018-046), and all experiments were conducted according to the Guidelines for Care and Use of Nonhuman Primates established by the Primate Research Institute, Kyoto University (2010). For the second set of our experiments with Monkeys E and F on application of AAV2.1-A vector to chemogenetic manipulation, the experimental protocol was approved by the Animal Ethics Committee of the National Institutes for Quantum Science and Technology (Permission Number: 11-1038-11), and all experiments were conducted in accordance with the Guide for the Care and Use of Nonhuman Primates in Neuroscience Research (Japan Neuroscience Society; <a href="https://www.jnss.org/en/animal_primates">https://www.jnss.org/en/animal_primates</a> ). For the third set of our experiments with Monkeys G and H on application of AAV2.1-A vector to in vivo calcium imaging, the experimental protocol was approved by the Animal Experiment Committee of Osaka University (Permission Number: FBS-18-005), and all experiments were conducted according to the Guidelines for Animal Experiments established by Osaka University. |

Note that full information on the approval of the study protocol must also be provided in the manuscript.

## Clinical data

Policy information about [clinical studies](#)

All manuscripts should comply with the ICMJE [guidelines for publication of clinical research](#) and a completed [CONSORT checklist](#) must be included with all submissions.

|                             |                                  |
|-----------------------------|----------------------------------|
| Clinical trial registration | <input type="text" value="N/A"/> |
| Study protocol              | <input type="text" value="N/A"/> |
| Data collection             | <input type="text" value="N/A"/> |
| Outcomes                    | <input type="text" value="N/A"/> |

## Dual use research of concern

Policy information about [dual use research of concern](#)

### Hazards

Could the accidental, deliberate or reckless misuse of agents or technologies generated in the work, or the application of information presented in the manuscript, pose a threat to:

| No                                  | Yes                      |                            |
|-------------------------------------|--------------------------|----------------------------|
| <input checked="" type="checkbox"/> | <input type="checkbox"/> | Public health              |
| <input checked="" type="checkbox"/> | <input type="checkbox"/> | National security          |
| <input checked="" type="checkbox"/> | <input type="checkbox"/> | Crops and/or livestock     |
| <input checked="" type="checkbox"/> | <input type="checkbox"/> | Ecosystems                 |
| <input checked="" type="checkbox"/> | <input type="checkbox"/> | Any other significant area |

### Experiments of concern

Does the work involve any of these experiments of concern:

| No                                  | Yes                      |                                                                             |
|-------------------------------------|--------------------------|-----------------------------------------------------------------------------|
| <input checked="" type="checkbox"/> | <input type="checkbox"/> | Demonstrate how to render a vaccine ineffective                             |
| <input checked="" type="checkbox"/> | <input type="checkbox"/> | Confer resistance to therapeutically useful antibiotics or antiviral agents |
| <input checked="" type="checkbox"/> | <input type="checkbox"/> | Enhance the virulence of a pathogen or render a nonpathogen virulent        |
| <input checked="" type="checkbox"/> | <input type="checkbox"/> | Increase transmissibility of a pathogen                                     |
| <input checked="" type="checkbox"/> | <input type="checkbox"/> | Alter the host range of a pathogen                                          |
| <input checked="" type="checkbox"/> | <input type="checkbox"/> | Enable evasion of diagnostic/detection modalities                           |
| <input checked="" type="checkbox"/> | <input type="checkbox"/> | Enable the weaponization of a biological agent or toxin                     |
| <input checked="" type="checkbox"/> | <input type="checkbox"/> | Any other potentially harmful combination of experiments and agents         |

## ChIP-seq

### Data deposition

- Confirm that both raw and final processed data have been deposited in a public database such as [GEO](#).
- Confirm that you have deposited or provided access to graph files (e.g. BED files) for the called peaks.

|                                                                    |                                  |
|--------------------------------------------------------------------|----------------------------------|
| Data access links<br><i>May remain private before publication.</i> | <input type="text" value="N/A"/> |
| Files in database submission                                       | <input type="text" value="N/A"/> |
| Genome browser session<br>(e.g. <a href="#">UCSC</a> )             | <input type="text" value="N/A"/> |

### Methodology

|                  |                                  |
|------------------|----------------------------------|
| Replicates       | <input type="text" value="N/A"/> |
| Sequencing depth | <input type="text" value="N/A"/> |

|                         |     |
|-------------------------|-----|
| Antibodies              | N/A |
| Peak calling parameters | N/A |
| Data quality            | N/A |
| Software                | N/A |

## Magnetic resonance imaging

### Experimental design

|                                 |     |
|---------------------------------|-----|
| Design type                     | N/A |
| Design specifications           | N/A |
| Behavioral performance measures | N/A |

### Acquisition

|                               |                                                                            |
|-------------------------------|----------------------------------------------------------------------------|
| Imaging type(s)               | N/A                                                                        |
| Field strength                | N/A                                                                        |
| Sequence & imaging parameters | N/A                                                                        |
| Area of acquisition           | N/A                                                                        |
| Diffusion MRI                 | <input type="checkbox"/> Used <input checked="" type="checkbox"/> Not used |

### Preprocessing

|                            |     |
|----------------------------|-----|
| Preprocessing software     | N/A |
| Normalization              | N/A |
| Normalization template     | N/A |
| Noise and artifact removal | N/A |
| Volume censoring           | N/A |

### Statistical modeling & inference

|                                                                           |                                                                                                       |
|---------------------------------------------------------------------------|-------------------------------------------------------------------------------------------------------|
| Model type and settings                                                   | N/A                                                                                                   |
| Effect(s) tested                                                          | N/A                                                                                                   |
| Specify type of analysis:                                                 | <input type="checkbox"/> Whole brain <input type="checkbox"/> ROI-based <input type="checkbox"/> Both |
| Statistic type for inference<br>(See <a href="#">Eklund et al. 2016</a> ) | N/A                                                                                                   |
| Correction                                                                | N/A                                                                                                   |

### Models & analysis

|                                     |                                                                       |
|-------------------------------------|-----------------------------------------------------------------------|
| n/a                                 | Involvement in the study                                              |
| <input checked="" type="checkbox"/> | <input type="checkbox"/> Functional and/or effective connectivity     |
| <input checked="" type="checkbox"/> | <input type="checkbox"/> Graph analysis                               |
| <input checked="" type="checkbox"/> | <input type="checkbox"/> Multivariate modeling or predictive analysis |
